# Supplementary material for: Diagnosing challenges and setting priorities for sustainable water resource management under climate change
Source: PubMed Central journal article supplement (PMC8764062; doi:10.1038/s41598-022-04766-2), 2022-01-17
Supplement: 41598_2022_4766_MOESM1_ESM.pdf [file 41598_2022_4766_MOESM1_ESM.pdf]

Supplementary Information

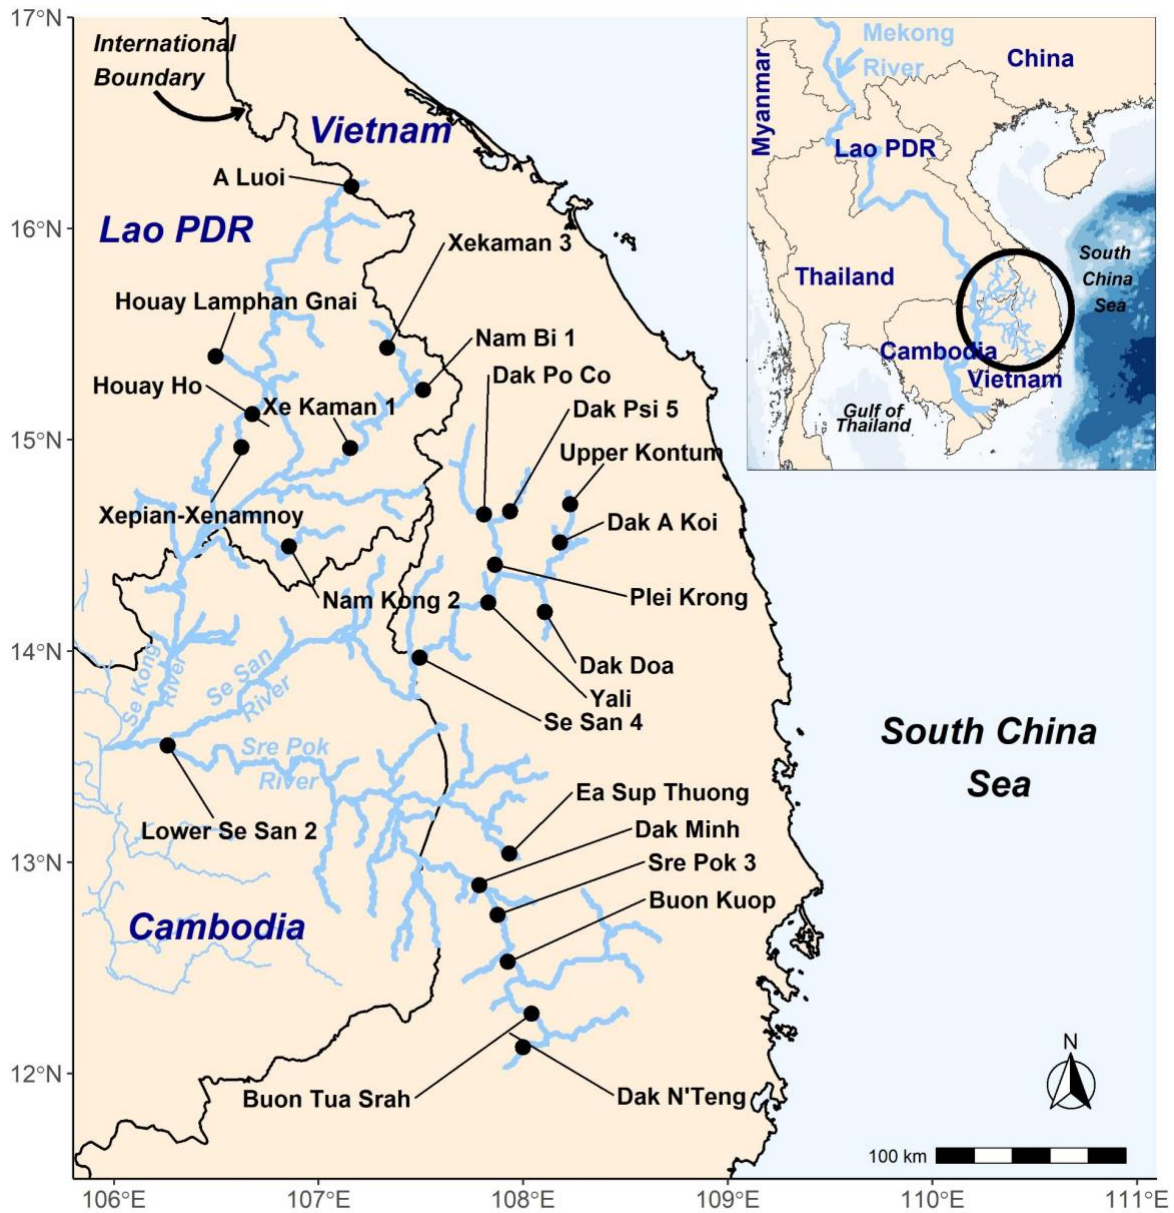

3 Figure S1. Modeled hydropower dams in the Se Kong Se San, and Sre Pok (3S) River Basin within  
4 the Mekong River Basin. The upper right map gives the location of the 3S River Basin within the  
5 Mekong River Basin. Black dots are existing and planned reservoirs examined under Business as  
6 Usual (BAU), Storage, and Release management scenarios. The 3S River Basin drainage area is

7 about 78,714 km<sup>2</sup>. Maps created and drafted using R: A language and environment for  
8 statistical computing version 4.0.3: <https://www.R-project.org/> (Vienna, Austria). The map  
9 layouts were plotted using EPSG Geodetic Parameter Dataset 4326 projection  
10 (<https://epsg.io/4326>).

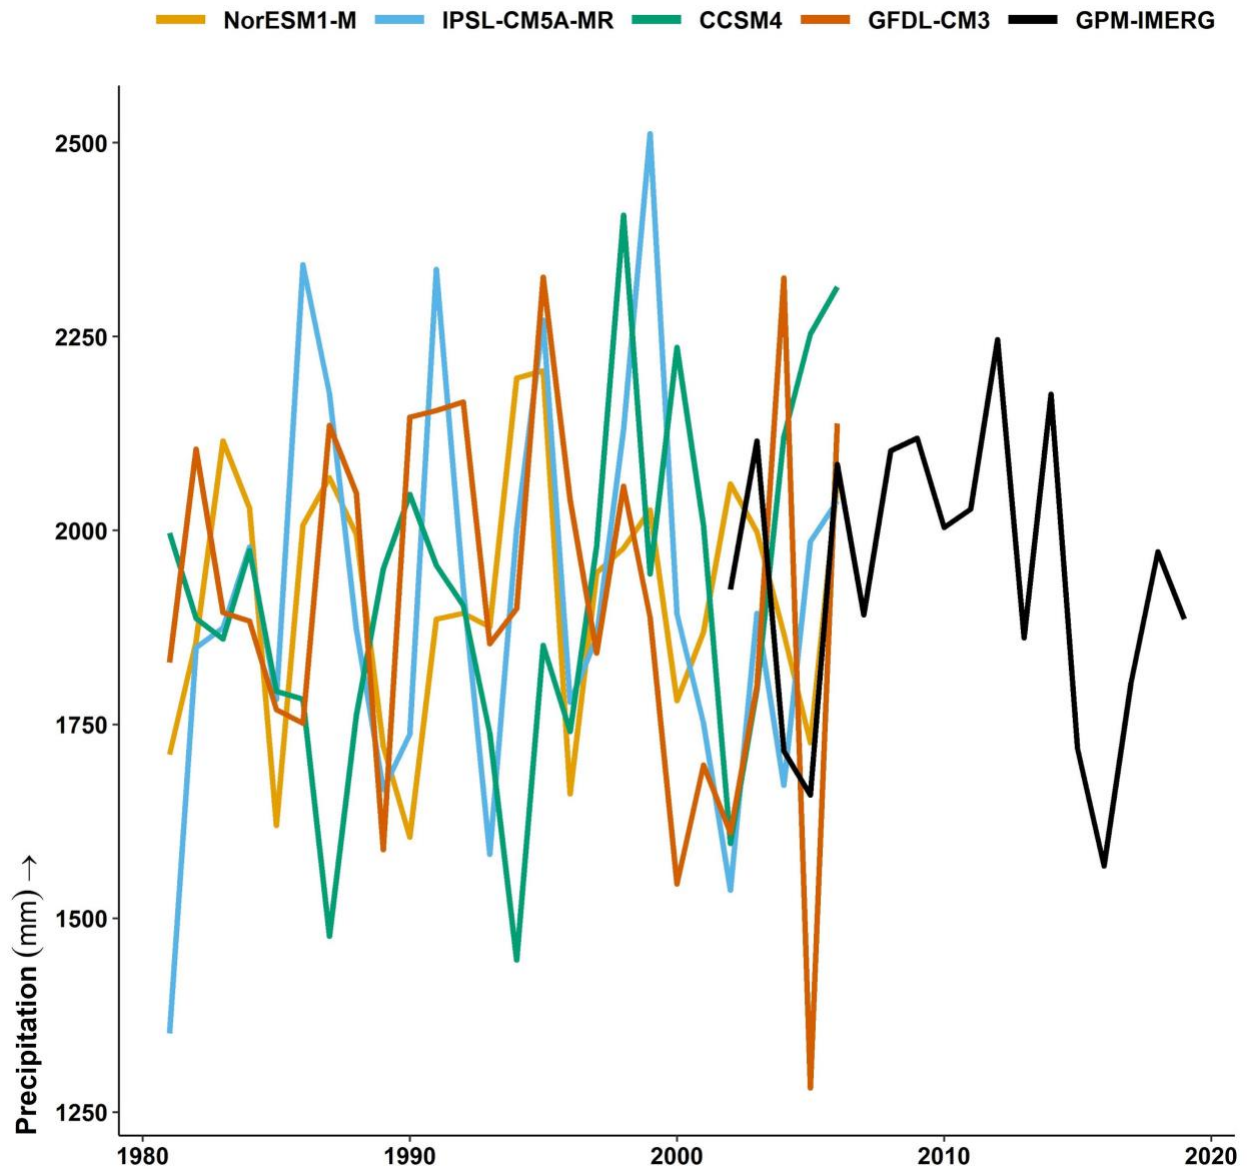

11

12 Figure S2. Annual precipitation from the Global Precipitation Measurement mission (GPM) over  
 13 the Lower Mekong in comparison with CMIP5 hindcast data. The Integrated Multi-satellite  
 14 Retrieval for the Global Precipitation Measurement mission (IMERG) dataset processed is  
 15 (GPM\_3IMERGDF) obtained from (<https://pmm.nasa.gov/data-access/downloads/gpm>).

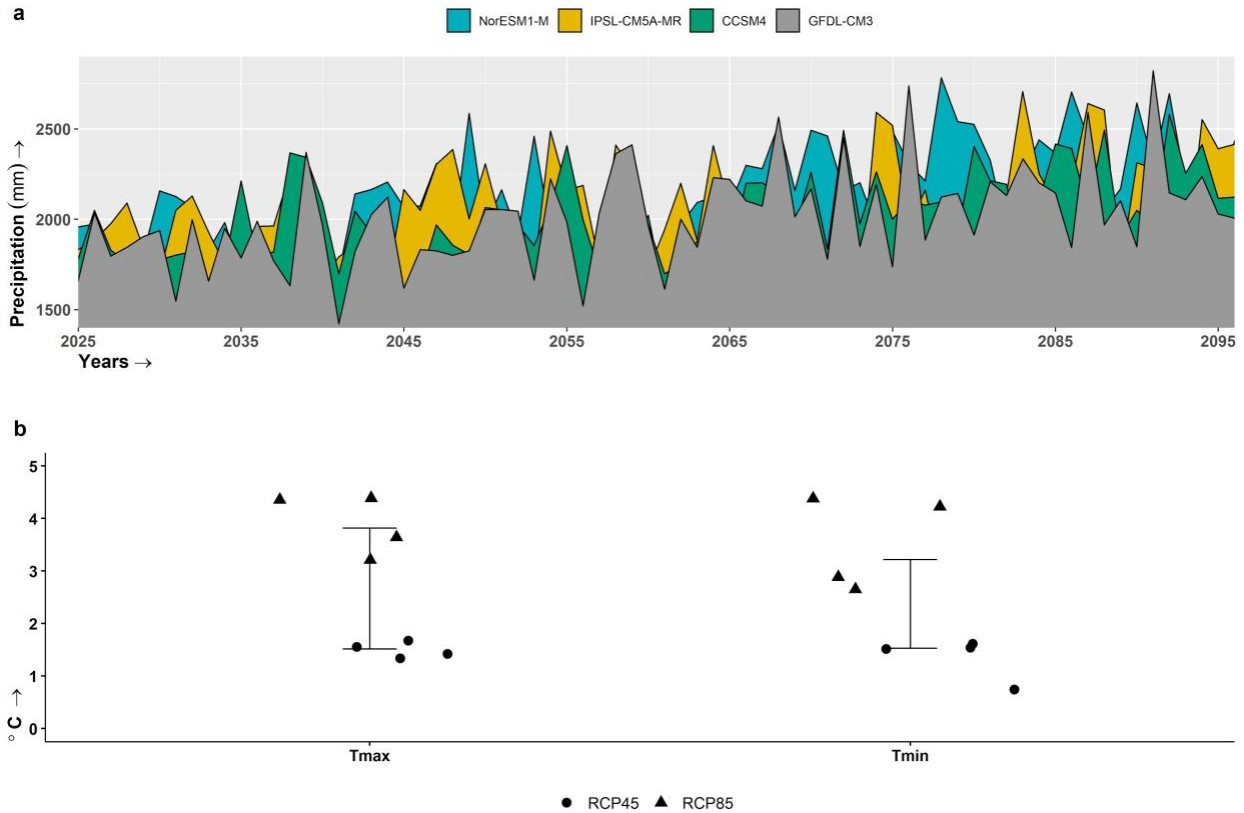

16

17 Figure S3. The Lower Mekong River Basin climate projection. Panel (a) gives the projected  
 18 annual precipitation amounts under the Coupled Model Intercomparison Project Phase 5  
 19 (CMIP5) representative concentration scenario (RCP 8.5). Panel (b) displays the projected  
 20 increase of mean annual air temperatures (Tmin & Tmax). Climate analysis for precipitation and  
 21 air temperature presented covers the time period from 2024 to 2095. Four climate model  
 22 groups (NorESM1-M, IPSL-CM5A, GFDL-CM3, and CCSM4) are studied. For air temperature unit  
 23 conversion, 0 degree Celsius is equal to 273.15 Kelvin.

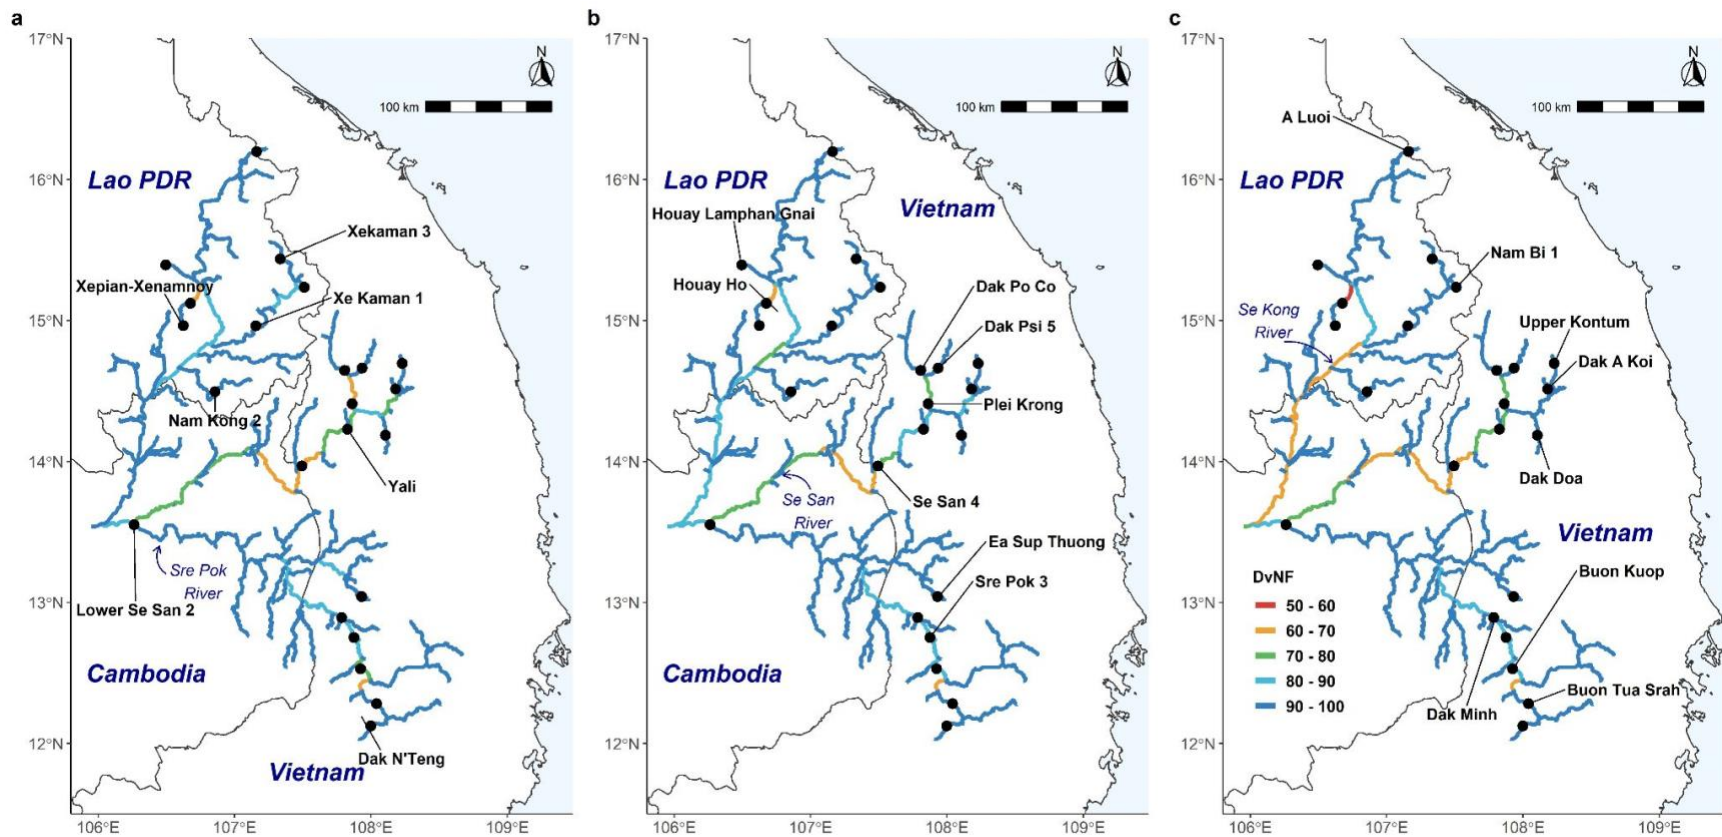

24

25 Figure S4. Spatial variation of the deviation from natural flow (DvNF) at the 3S River Basin under the Coupled Model Intercomparison  
 26 Project Phase 5 (CMIP5) representative concentration scenario (RCP 8.5) with the GFDL-CM3 climate group is displayed for different  
 27 management scenarios — i.e., panel a (Storage), panel b (Business as Usual, BAU), panel c (Release). Black dots refer to existing and  
 28 planned reservoirs modeled in the 3S region. Maps created and drafted using R: A language and environment for statistical

- 29 computing version 4.0.3: <https://www.R-project.org/> (Vienna, Austria). The map layouts were plotted using EPSG Geodetic
- 30 Parameter Dataset 4326 projection (<https://epsg.io/4326>).

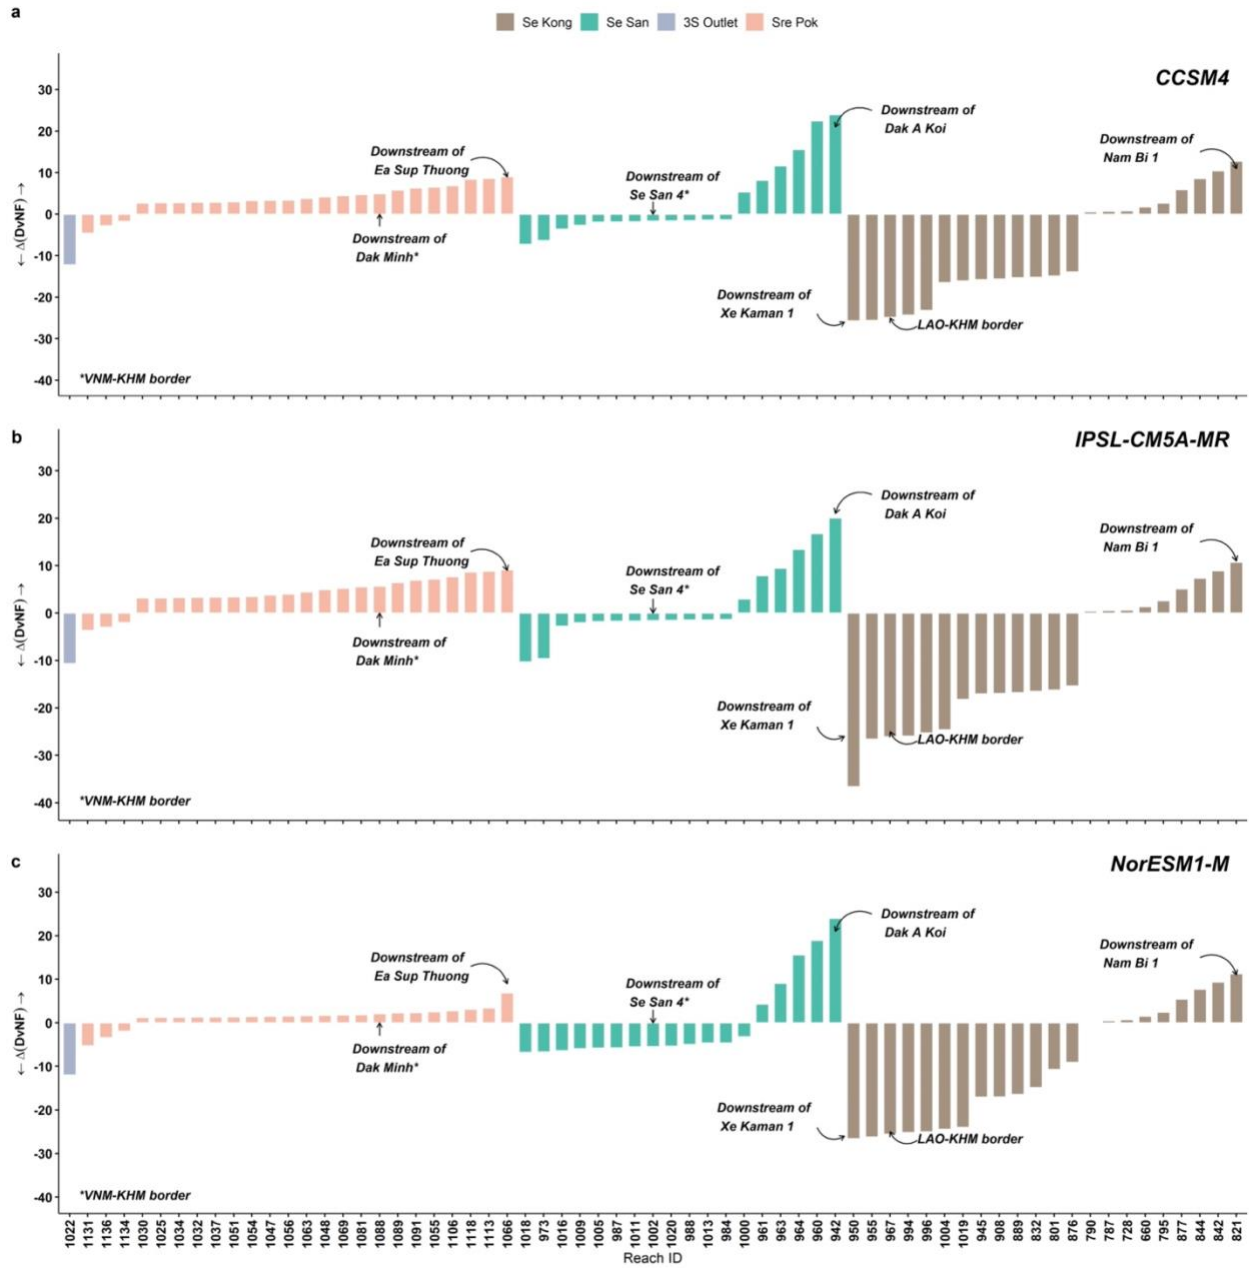

31

32 Figure S5. Bar plot of the change in deviation from natural flow ( $\Delta DvNF = DvNF_{Storage} -$   
 33  $DvNF_{Release}$ ) at the 3S River Basin under the Coupled Model Intercomparison Project Phase 5  
 34 (CMIP5) representative concentration scenario (RCP 8.5) with the (a) CCSM4, (b) IPSL-CM5A-  
 35 MR, and (c) NorESM1-M climate groups. A zero in  $\Delta DvNF$  refers to 3S River segments that are  
 36 insensitive to management scenarios. The  $DvNF$  results shown were calculated from 2025 to

- 37 2050 time period. The 3S River segments are labeled with Reach ID numbers (e.g., Reach ID #
- 38 1022 is the 3S Outlet).



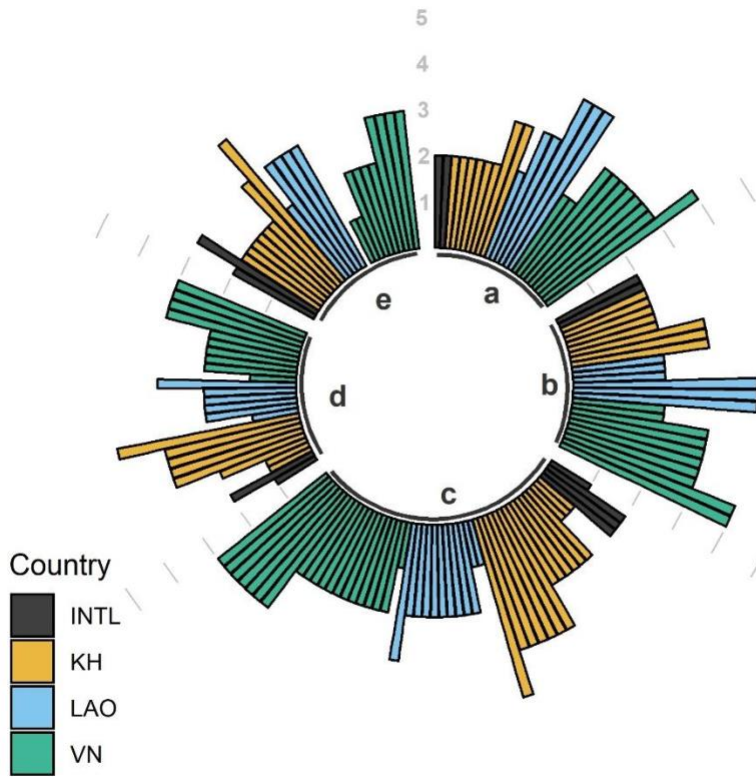

39

40 Figure S6. Financial capacity questionnaire responses from the 3S Governance and Stakeholders

41 survey a) level of investment in water supply development, b) level of investment in service

42 delivery systems, c) level of investment in wastewater handling and treatment, d) level of

43 investment in ecosystem conservation and rehabilitation, and e) level of investment in

44 monitoring and enforcement.

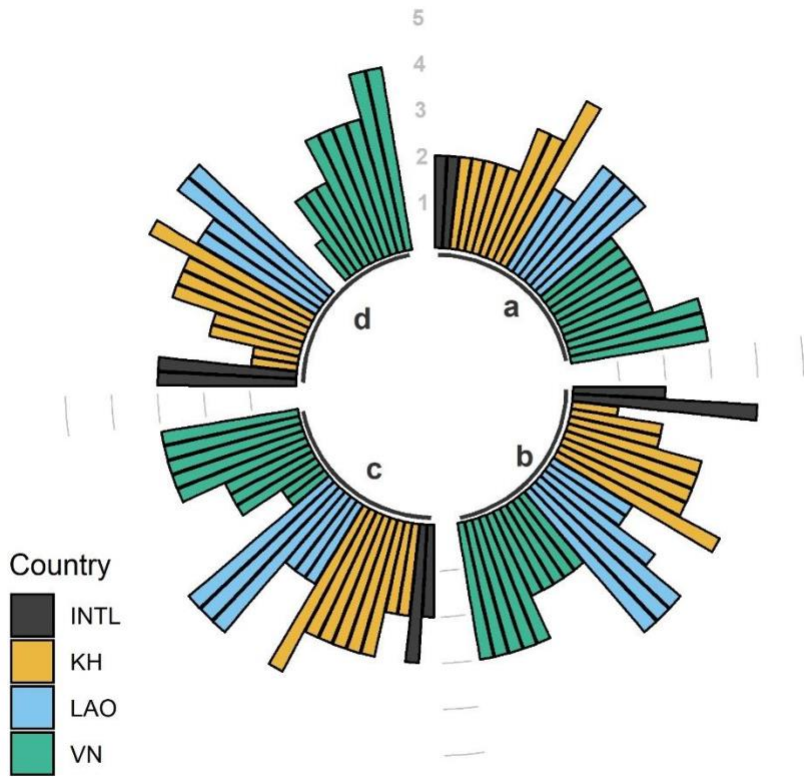

45

46 Figure S7. Information access and knowledge questionnaire responses from the 3S Governance

47 and Stakeholders survey. a) information is accessible to interested stakeholders; b) information

48 meets expected quality standards, in terms of frequency, level of detail, and subjects of interest

49 to stakeholders; c) information is transparently sourced; and d) all available, sound and relevant

50 information is routinely applied in decision-making.

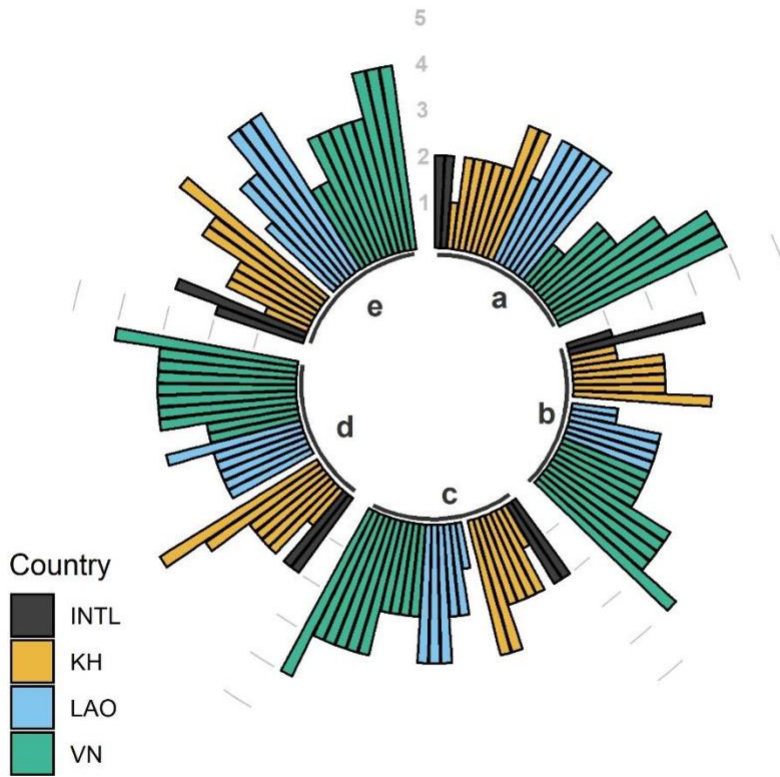

51

52 Figure S8. Enforcement and compliance questionnaire responses from the 3S Governance and  
 53 Stakeholders survey. a) surface water abstraction guidelines are enforced; b) groundwater  
 54 abstraction guidelines are enforced; c) flow requirement guidelines are enforced; d) water  
 55 quality guidelines are enforced; and e) land use guidelines are enforced.

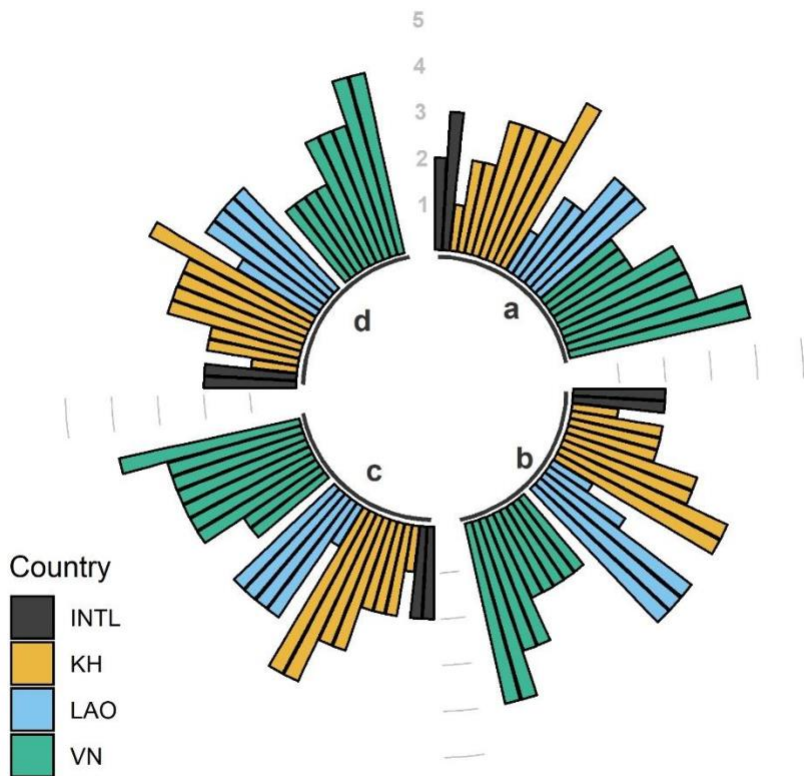

56

57 Figure S9. Distribution of benefits from ecosystem services questionnaire responses on the  
 58 from the 3S Governance and Stakeholders survey. a) economically vulnerable populations  
 59 benefit from ecosystem services; b) indigenous people benefit from ecosystem services; c)  
 60 women and girls benefit from ecosystem services; and d) resource-dependent communities  
 61 benefit from ecosystem services.

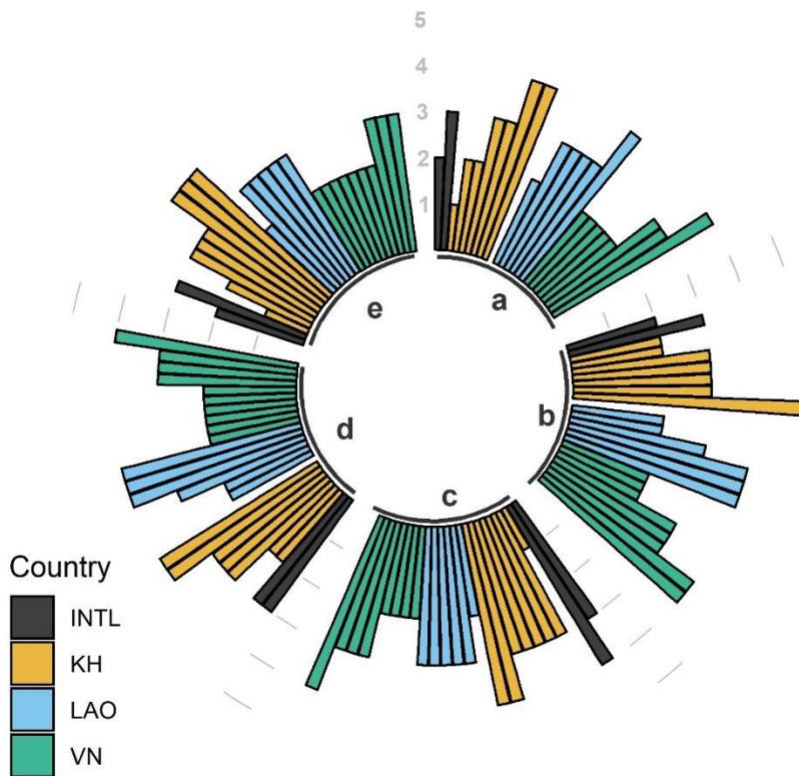

62

63 Figure S10. Water-related conflict questionnaire responses from the 3S Governance and  
 64 Stakeholders survey a) frequency of conflict due to overlapping jurisdictions (e.g., between  
 65 national governments in transboundary systems, provincial and national government, or  
 66 between agencies); b) frequency of conflict about water rights allocation; c) frequency of  
 67 conflict about access; d) frequency of conflict regarding the siting of infrastructure; and e)  
 68 frequency of conflict over water quality and other downstream negative impacts.

69 Table S1. The Coupled Model Intercomparison Project Phase 5 (CMIP5) groups examined.

| No. | Modeling Center                            | Institute ID | Model Name   |
|-----|--------------------------------------------|--------------|--------------|
| 1   | National Center for Atmospheric Research   | NCAR         | CCSM4        |
| 2   | NOAA Geophysical Fluid Dynamics Laboratory | NOAA GFDL    | GFDL-CM3     |
| 3   | Institut Pierre-Simon Laplace              | IPSL         | IPSL-CM5A-MR |
| 4   | Norwegian Climate Centre                   | NCC          | NorESM1-M    |

71 Table S2. Current and under development reservoirs used at the Se Kong, Se San, and Sre Pok (3S) River Basins modeling framework.

| No | Name          | River             | Latitude    | Longitude    | Country                       | COD  | Storage            |                    | Dry Season Discharge |                     |                     | Installed Capacity |
|----|---------------|-------------------|-------------|--------------|-------------------------------|------|--------------------|--------------------|----------------------|---------------------|---------------------|--------------------|
|    |               |                   |             |              |                               |      | Capacity – FSL     | Reservoir Area     | BAU                  | Storage             | Release             |                    |
|    |               |                   |             |              |                               |      | (Mm <sup>3</sup> ) | (km <sup>2</sup> ) | (m <sup>3</sup> /s)  | (m <sup>3</sup> /s) | (m <sup>3</sup> /s) |                    |
| 1  | A Luoi        | A Sap             | 16° 11' 51" | 107° 9' 43"  | Socialist Republic of Vietnam | 2012 | 60.20              | 20.80              | 49                   | 24.5                | 98                  | 170                |
| 2  | Buôn Kốp      | Sre Pok           | 12° 31' 30" | 107° 55' 33" | Socialist Republic of Vietnam | 2009 | 63.24              | 5.57               | 100                  | 50                  | 100                 | 280                |
| 3  | Buon Tua Srah | Sre Pok/Krong Kno | 12° 16' 56" | 108° 2' 29"  | Socialist Republic of Vietnam | 2009 | 786.90             | 37.10              | 100                  | 50                  | 100                 | 86                 |

|   |            |                   |             |              |                               |      |        |        |     |      |      |     |
|---|------------|-------------------|-------------|--------------|-------------------------------|------|--------|--------|-----|------|------|-----|
| 4 | Dak A Koi  | Dak A Koi         | 14° 30' 47" | 108° 10' 55" | Socialist Republic of Vietnam | 2007 | 150.00 | 7.00   | 18  | 9    | 36   | 60  |
| 5 | Dak Doa    | Ia Krom           | 14° 11' 5"  | 108° 6' 24"  | Socialist Republic of Vietnam | 2010 | 29.13  | 2.28   | 35  | 17.5 | 70   | 14  |
| 6 | Dak Minh   | Dak Man           | 12° 54' 33" | 107° 48' 17" | Socialist Republic of Vietnam | N/A  | 0.15   | 10.00  | 195 | 97.5 | 195  | N/A |
| 7 | Dak N'Teng | Dak N'Teng        | 12° 11' 46" | 107° 55' 36" | Socialist Republic of Vietnam | 2011 | 25.49  | 323.00 | 5.6 | 2.8  | 11.2 | 13  |
| 8 | Dak Po Co  | Krong Po Ko/Sesan | 14° 38' 43" | 107° 48' 30" | Socialist Republic of Vietnam | 2015 | 3.39   | 0.74   | 83  | 41.5 | 166  | 15  |
| 9 | Dak Psi 5  | Dak Psi           | 14° 39' 41" | 107° 56' 12" | Socialist Republic of Vietnam | 2012 | 2.40   | 638.00 | 46  | 23   | 92   | 10  |



|    |                    |                 |             |              |                                  |                   |          |        |     |      |     |       |
|----|--------------------|-----------------|-------------|--------------|----------------------------------|-------------------|----------|--------|-----|------|-----|-------|
| 10 | Ea Sup Thuong      | Ea Sup          | 13° 2' 4"   | 107° 55' 56" | Socialist Republic of Vietnam    | 2004              | 146.00   | 15.00  | 29  | 14.5 | 58  | —     |
| 11 | Houay Ho           | Houayho, Xekong | 15° 3' 34"  | 106° 45' 52" | Lao People's Democratic Republic | 1999              | 3,530.00 | 37.00  | 11  | 5.5  | 22  | 152.1 |
| 12 | Houay Lamphan Gnai | Xe Kong         | 15° 21' 36" | 106° 29' 54" | Lao People's Democratic Republic | 2015              | 140.00   | 9.00   | 20  | 10   | 40  | 88    |
| 13 | Lower Se San 2     | Se San          | 13° 33' 5"  | 106° 15' 50" | Kingdom of Cambodia              | 2019              | 1,790.00 | 335.00 | 195 | 97.5 | 195 | 480   |
| 14 | Nam Bi 1           | Nam Kai         | 15° 14' 8"  | 107° 30' 57" | Lao People's Democratic Republic | 2021 <sup>‡</sup> | 3.00     | 0.03   | 2   | 1    | 4   | 50    |

|    |              |                              |             |              |                                        |                   |          |        |     |      |     |     |
|----|--------------|------------------------------|-------------|--------------|----------------------------------------|-------------------|----------|--------|-----|------|-----|-----|
| 15 | Nam Kong 2   | Nam Kong                     | 14° 29' 41" | 106° 51' 24" | Lao People's<br>Democratic<br>Republic | 2021 <sup>†</sup> | 71.40    | 4.20   | 55  | 27.5 | 110 | 66  |
| 16 | Plei Krong   | Se San/ Kroong<br>Po Ko      | 14° 24' 30" | 107° 51' 47" | Socialist Republic<br>of Vietnam       | 2008              | 1,048.70 | 53.28  | 20  | 10   | 40  | 100 |
| 17 | Se San 4     | Se San                       | 13° 58' 6"  | 107° 29' 43" | Socialist Republic<br>of Vietnam       | 2009              | 893.30   | 58.41  | 195 | 97.5 | 195 | 360 |
| 18 | Sre Pok 3    | Sre Pok                      | 12° 45' 8"  | 107° 52' 36" | Socialist Republic<br>of Vietnam       | 2009              | 219.00   | 17.68  | 130 | 65   | 130 | 220 |
| 19 | Upper Kontum | Se San/ Dak<br>Bla/ Dak Nghe | 14° 41' 39" | 108° 13' 48" | Socialist Republic<br>of Vietnam       | 2011              | 174.00   | 7.08   | 55  | 27.5 | 110 | 250 |
| 20 | Xe Kaman 1   | Xe Kaman                     | 14° 57' 39" | 107° 9' 23"  | Lao People's<br>Democratic<br>Republic | 2015              | 4,804.00 | 149.80 | 55  | 27.5 | 110 | 290 |

|    |                 |                     |             |              |                                        |      |          |       |     |      |      |     |
|----|-----------------|---------------------|-------------|--------------|----------------------------------------|------|----------|-------|-----|------|------|-----|
| 21 | Xe Kaman 3      | Houayho,<br>Xekong  | 15° 26' 10" | 107° 20' 12" | Lao People's<br>Democratic<br>Republic | 2014 | 141.50   | 5.20  | 55  | 27.5 | 110  | 250 |
| 22 | Xepian-Xenamnoy | Xepian/Xenam<br>noy | 14° 56' 47" | 106° 37' 39" | Lao People's<br>Democratic<br>Republic | 2018 | 1,092.00 | 50.00 | 6.7 | 3.35 | 13.4 | 410 |
| 23 | Yali            | Se San              | 14° 13' 39" | 107° 49' 47" | Socialist Republic<br>of Vietnam       | 2001 | 1,037.00 | 64.50 | 195 | 97.5 | 195  | 720 |

72 †: Planned

73 COD: Commercial Operation Date (i.e., when the dam was commissioned)

74 BAU: Business as usual for dry season reservoir release discharge

75 N/A: Not Available
